# Supplementary material for: Oral Collagen Drink for Antiaging: Antioxidation, Facilitation of the Increase of Collagen Synthesis, and Improvement of Protein Folding and DNA Repair in Human Skin Fibroblasts
Source: Hindawi journal article supplement (doi:10.1155/2020/8031795), 2020-05-11
Supplement: f1 [file 8031795.f1.pdf]

## Supplementary information

### Oral collagen drink for anti-aging: anti-oxidation, facilitation of the increase of collagen synthesis, and improvement of protein folding and DNA repair in human skin fibroblasts

Ping Lin<sup>1</sup>, Nan Hua<sup>2</sup>, Yu-Chen Hsu<sup>3</sup>, Kai-Wen Kan<sup>3</sup>, Jia-Haur Chen<sup>3</sup>, Yung-Hao Lin<sup>4</sup>, Yung-Hsiang Lin<sup>1</sup>, Chen-Meng Kuan<sup>1</sup>

<sup>1</sup> Research & Design Center, TCI Co., Ltd., Taipei 114, Taiwan

<sup>2</sup> Zhejiang Kazman Biotechnology Co., Ltd., Xiaoshan District 311200, China

<sup>3</sup> Research & Design Center, TCI Gene Inc., Taipei 114, Taiwan

<sup>4</sup> Global Business Center, TCI Co., Ltd., Taipei 114, Taiwan

Correspondence should be addressed to Chen-Meng Kuan; Chenmeng.Kuan@tci-bio.com

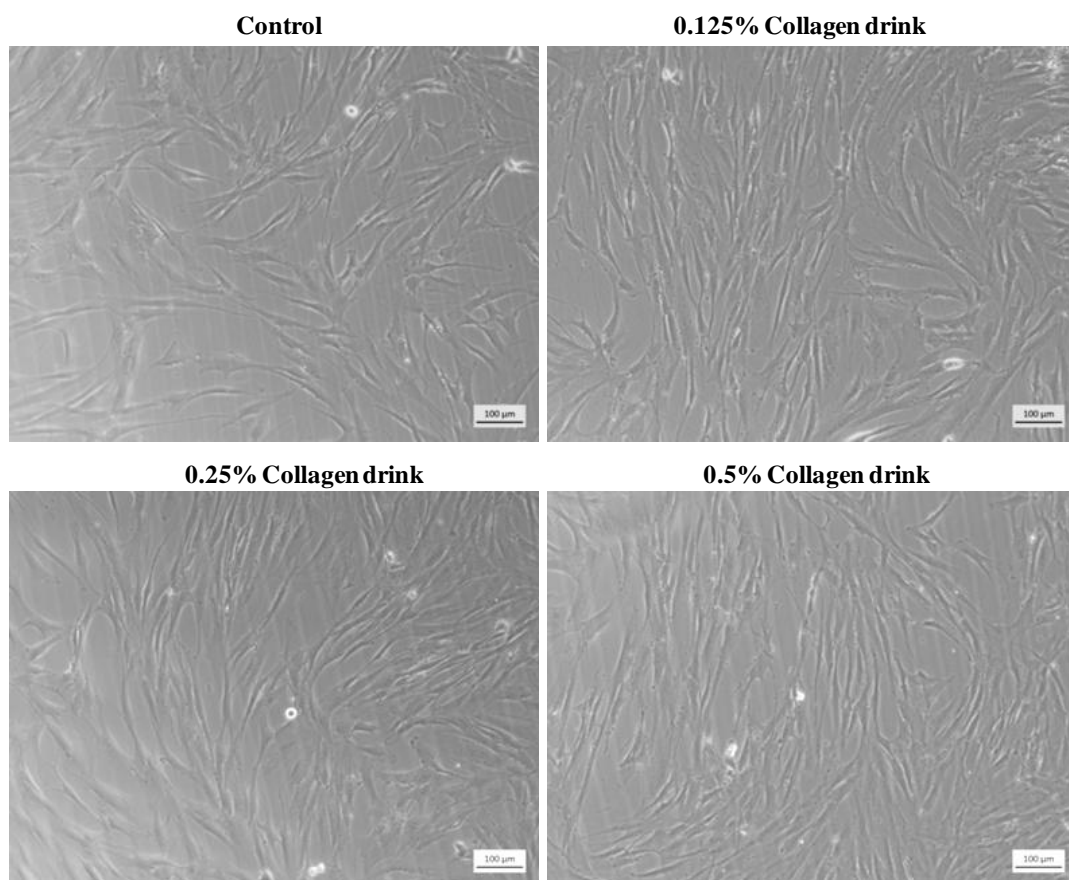

**Figure 1.** Optical images of fibroblasts after treatment with different concentrations of collagen drinks for 24 hours.

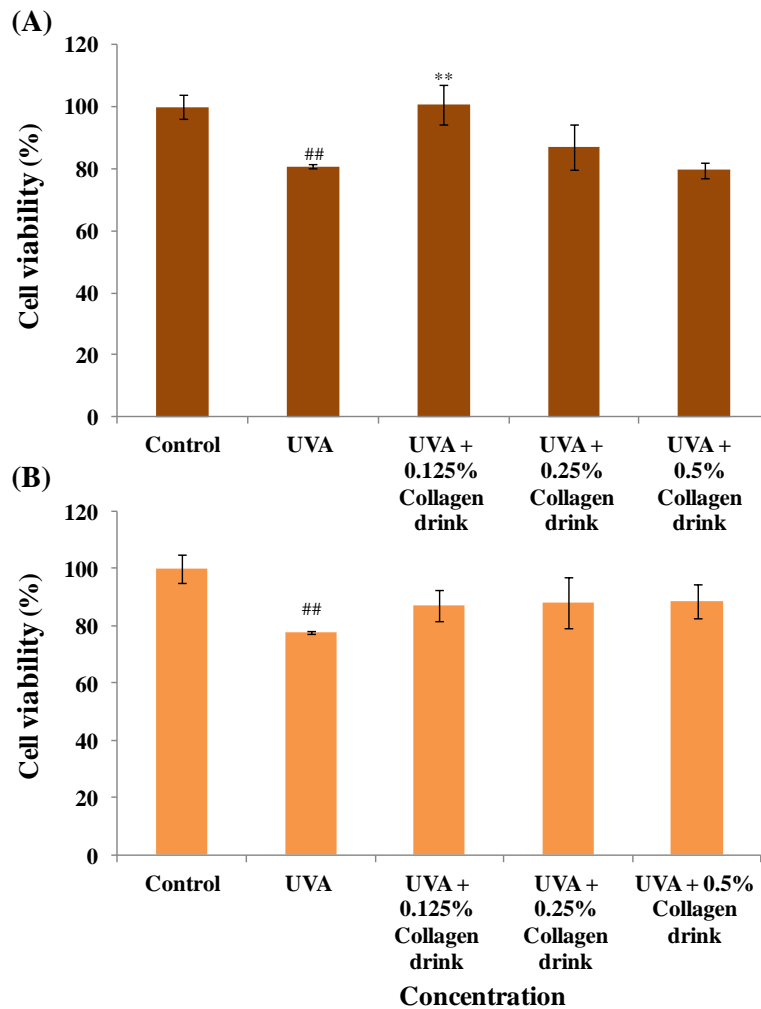

**Figure 2.** Result of cell viability of fibroblasts. (A) CCD-966Sk cells were treated with 0%, 0.125%, 0.25%, or 0.5% for 24 hrs following UVA treatment ( $10 \text{ J/cm}^2$ ). (B) CCD-966Sk cells in 0.125%, 0.25%, or 0.5% collagen drink were treated with UVA ( $10 \text{ J/cm}^2$ ) followed by 24-hour incubation. ( $n = 3$ , mean value  $\pm$  S.D.) (Corresponding to the control group: <sup>##</sup>,  $p < 0.01$ ; corresponding to the UVA group: <sup>\*\*</sup>,  $p < 0.01$ )

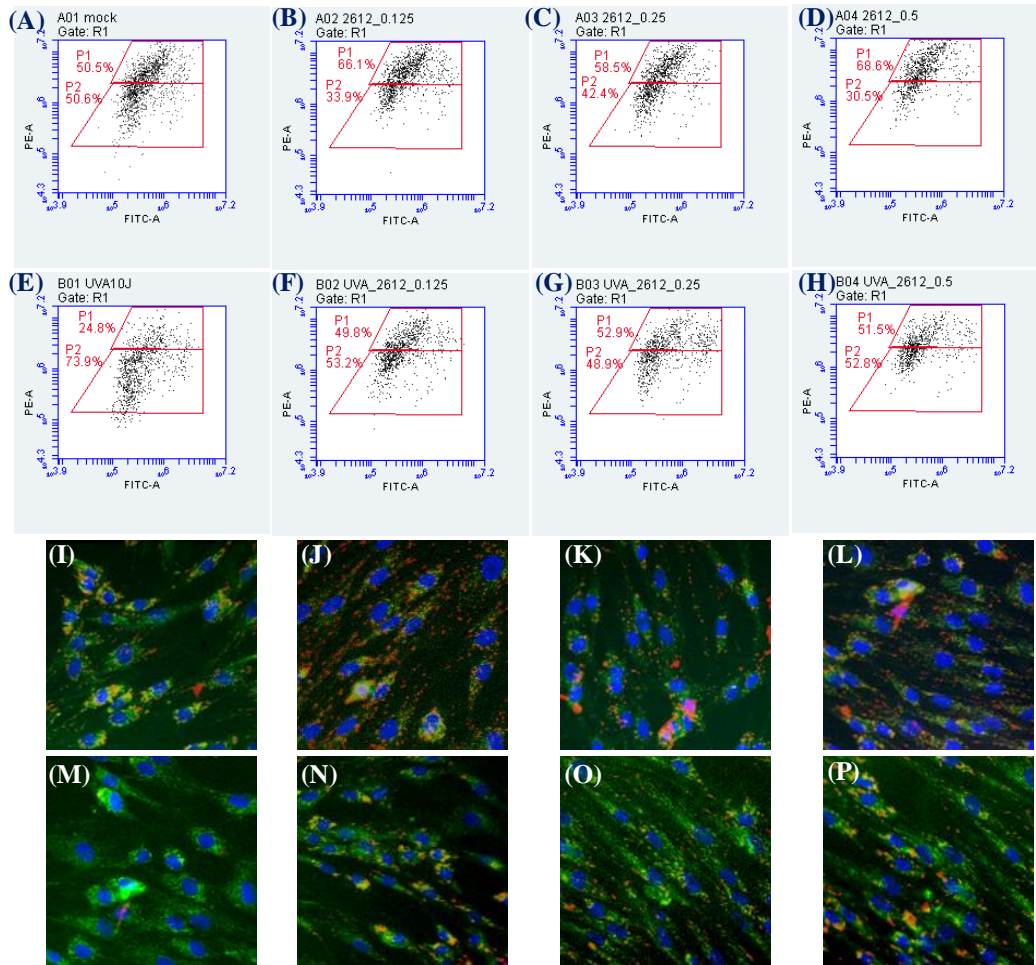

**Figure 3.** Results of flow cytometry pattern and fluorescence image of imitochondrial activity in fibroblasts. CCD-966Sk cells were treated with JC-1 dye (red signal) to assess the mitochondrial activity in fibroblasts and their signals were analysed by a flow cytometry by the percentage of cell signal at the P1 zone, which was defined by a ratio of 1 (green signal from FITC channel) : 1 (red signal from PE-A channel). (A, I) Control. (B, J) 0.125% Collagne drink. (C, K) 0.25% Collagne drink. (D, L) 0.5% Collagne drink. (E, M) UVA only. (F, N) UVA + 0.125% Collagne drink. (G, O) UVA + 0.25% Collagne drink. (H, P) UVA + 0.5% Collagne drink

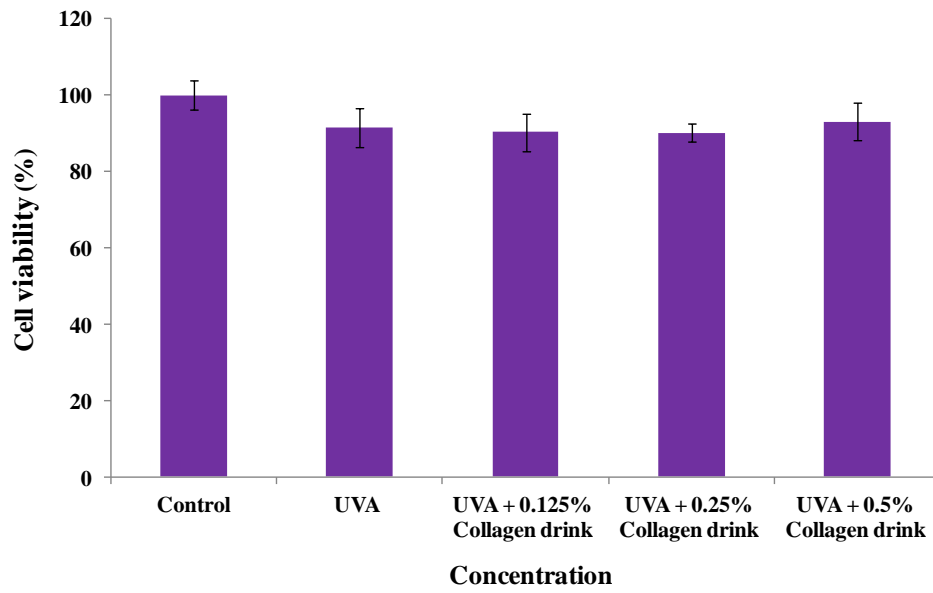

**Figure 4.** Result of cell viability of fibroblasts. CCD-966Sk cells were treated with 0.125%, 0.25%, or 0.5% for 48 hrs. ( $n = 3$ , mean value  $\pm$  S.D.)
